# Supplementary material for: The Psychometric Properties of the Older People's Quality of Life Questionnaire, Compared with the CASP-19 and the WHOQOL-OLD
Source: PubMed Central journal article supplement (PMC2819744; doi:10.1155/2009/298950), 2010-02-01
Supplement: 298950.f3.pdf [file 298950.f3.pdf]

**Supplementary file Table 2. Control, Autonomy, Pleasure, Self-realisation (CASP-19) items**

|                                                                      | <b>Ethnibus 2008</b> | <b>ONS Omnibus 2008</b> |
|----------------------------------------------------------------------|----------------------|-------------------------|
| <b>CASP-19 items:</b>                                                | <b>% (n)</b>         | <b>% (n) *</b>          |
| <b>Control:</b>                                                      |                      |                         |
| <i>1. - My age prevents me from doing the things I would like to</i> |                      |                         |
| Very often                                                           | 4 (16)               | 15 (85)*****            |
| Sometimes                                                            | 26 (105)             | 38 (224)                |
| Not very often                                                       | 55 (219)             | 25 (150)                |
| Never                                                                | 15 (60)              | 22 (127)                |
| <i>2. - I feel that what happens to me is out of my control</i>      |                      |                         |
| Very often                                                           | 6 (23)               | 9 (50)*****             |
| Sometimes                                                            | 19 (76)              | 31 (182)                |
| Not very often                                                       | 51 (206)             | 33 (194)                |
| Never                                                                | 24 (95)              | 27 (158)                |
| <i>3. + I feel free to plan for the future</i>                       |                      |                         |
| Very often                                                           | 16 (65)              | 43 (253)*****           |
| Sometimes                                                            | 28 (111)             | 37 (217)                |
| Not very often                                                       | 35 (138)             | 16 (89)                 |
| Never                                                                | 21 (86)              | 4 (25)                  |
| <i>4. - I feel left out of things</i>                                |                      |                         |

|                                                                             |          |              |
|-----------------------------------------------------------------------------|----------|--------------|
| Very often                                                                  | 3 (11)   | 3 (19)ns     |
| Sometimes                                                                   | 15 (61)  | 21 (121)     |
| Not very often                                                              | 47 (189) | 27 (158)     |
| Never                                                                       | 35 (139) | 49 (287)     |
| <b>Autonomy:</b>                                                            |          |              |
| <b>5. + I can do the things that I want to do</b>                           |          |              |
| Very often                                                                  | 11 (42)  | 54 (320)**** |
| Sometimes                                                                   | 49 (198) | 36 (210)     |
| Not very often                                                              | 35 (141) | 8 (46)       |
| Never                                                                       | 5 (19)   | 2 (11)       |
| <b>6. - Family responsibilities prevent me from doing what I want to do</b> |          |              |
| Very often                                                                  | --- (2)  | 1 (9)*       |
| Sometimes                                                                   | 8 (32)   | 12 (69)      |
| Not very often                                                              | 52 (207) | 29 (168)     |
| Never                                                                       | 40 (159) | 58 (340)     |
| <b>7. + I feel that I can please myself what I can do</b>                   |          |              |
| Very often                                                                  | 24 (95)  | 66 (388)**** |
| Sometimes                                                                   | 36 (145) | 26 (156)     |
| Not very often                                                              | 33 (131) | 5 (27)       |
| Never                                                                       | 7 (29)   | 3 (15)       |
| <b>8. - My health stops me from doing the</b>                               |          |              |

|                                                                           |          |              |
|---------------------------------------------------------------------------|----------|--------------|
| <i>things I want to do</i>                                                |          |              |
| Very often                                                                | 13 (51)  | 14 (81)ns    |
| Sometimes                                                                 | 23 (93)  | 33 (193)     |
| Not very often                                                            | 39 (154) | 22 (132)     |
| Never                                                                     | 25 (102) | 31 (180)     |
| <b>9. - Shortage of money stops me from doing the things I want to do</b> |          |              |
| Very often                                                                | 10 (39)  | 10 (56)ns    |
| Sometimes                                                                 | 19 (76)  | 28 (166)     |
| Not very often                                                            | 39 (155) | 31 (180)     |
| Never                                                                     | 33 (130) | 31 (184)     |
| <b>Pleasure</b>                                                           |          |              |
| <b>10. + I look forward to each day</b>                                   |          |              |
| Very often                                                                | 22 (88)  | 75 (439)**** |
| Sometimes                                                                 | 49 (197) | 21 (121)     |
| Not very often                                                            | 25 (100) | 4 (22)       |
| Never                                                                     | 4 (15)   | --- (4)      |
| <b>11. + I feel that my life has meaning</b>                              |          |              |
| Very often                                                                | 13 (52)  | 66 (390)**** |
| Sometimes                                                                 | 57 (228) | 27 (156)     |
| Not very often                                                            | 26 (103) | 5 (30)       |
| Never                                                                     | 4 (17)   | 2 (9)        |
| <b>12. + I enjoy the things that I do</b>                                 |          |              |

|                                                                        |          |              |
|------------------------------------------------------------------------|----------|--------------|
| Very often                                                             | 26 (106) | 80 (470)**** |
| Sometimes                                                              | 50 (198) | 19 (110)     |
| Not very often                                                         | 23 (93)  | 1 (6)        |
| Never                                                                  | 1 (3)    | --- (1)      |
| <b>13. + I enjoy being in the company of others</b>                    |          |              |
| Very often                                                             | 28 (112) | 71 (418)**** |
| Sometimes                                                              | 58 (233) | 26 (152)     |
| Not very often                                                         | 13 (52)  | 3 (16)       |
| Never                                                                  | 1 (3)    | --- (1)      |
| <b>14. + On balance, I look back on life with a sense of happiness</b> |          |              |
| Very often                                                             | 31 (126) | 76 (444)**** |
| Sometimes                                                              | 44 (177) | 21 (123)     |
| Not very often                                                         | 21 (82)  | 3 (17)       |
| Never                                                                  | 4 (15)   | --- (2)      |
| <b>Self-realisation:</b>                                               |          |              |
| <b>15. + I feel full of energy these days</b>                          |          |              |
| Very often                                                             | 3 (12)   | 19 (112)**** |
| Sometimes                                                              | 41 (162) | 46 (271)     |
| Not very often                                                         | 33 (132) | 26 (150)     |
| Never                                                                  | 23 (94)  | 9 (54)       |
| <b>16. + I choose to do things that I have never done before</b>       |          |              |

|                                                                          |                                             |                                                 |
|--------------------------------------------------------------------------|---------------------------------------------|-------------------------------------------------|
| Very often                                                               | 10 (40)                                     | 7 (41)ns                                        |
| Sometimes                                                                | 23 (94)                                     | 34 (202)                                        |
| Not very often                                                           | 44 (176)                                    | 37 (216)                                        |
| Never                                                                    | 23 (90)                                     | 22 (128)                                        |
| <b><i>17. + I feel satisfied with the way my life has turned out</i></b> |                                             |                                                 |
| Very often                                                               | 15 (59)                                     | 56 (326)****                                    |
| Sometimes                                                                | 45 (180)                                    | 36 (214)                                        |
| Not very often                                                           | 34 (137)                                    | 6 (34)                                          |
| Never                                                                    | 6 (24)                                      | 2 (12)                                          |
| <b><i>18. + I feel that life is full of opportunities</i></b>            |                                             |                                                 |
| Very often                                                               | 4 (17)                                      | 34 (195)****                                    |
| Sometimes                                                                | 22 (90)                                     | 38 (223)                                        |
| Not very often                                                           | 54 (215)                                    | 23 (136)                                        |
| Never                                                                    | 20 (78)                                     | 5 (31)                                          |
| <b><i>19. + I feel that the future looks good for me</i></b>             |                                             |                                                 |
| Very often                                                               | 6 (24)                                      | 32 (186)****                                    |
| Sometimes                                                                | 39 (158)                                    | 46 (271)                                        |
| Not very often                                                           | 45 (180)                                    | 17 (97)                                         |
| Never                                                                    | 10 (38)                                     | 5 (30)                                          |
| <b>No. of respondents [item non-response]</b>                            | <b>400</b><br><i>[item non-response 0%]</i> | <b>583-587</b><br><i>[item non-response 1%]</i> |

- Note CASP-19 reverse coding of positively worded items (3-0), so higher scores representing higher QoL

*ns* not statistically significant at least at  $p < 0.05$  level

\*  $p < 0.05$

\*\*\*\*  $P < 0.0001$
