# Supplementary material for: The Psychometric Properties of the Older People's Quality of Life Questionnaire, Compared with the CASP-19 and the WHOQOL-OLD
Source: PubMed Central journal article supplement (PMC2819744; doi:10.1155/2009/298950), 2010-02-01
Supplement: 298950.f6.pdf [file 298950.f6.pdf]

| <b>Supplementary file Table 5. CASP-19 subscale reliability</b>                                       |                           |                        |                          |                          |                                         |                                             |
|-------------------------------------------------------------------------------------------------------|---------------------------|------------------------|--------------------------|--------------------------|-----------------------------------------|---------------------------------------------|
| <b>CASP -19 Subscales:<br/>Casp-19 TOTAL</b><br><br><b>[19 items; 5-point (0-3) scale range 0-57)</b> | <b>Mean for sub-scale</b> | <b>sd for subscale</b> | <b>Subscale skewness</b> | <b>Subscale kurtosis</b> | <b>Inter Subscale Correlation range</b> | <b>Corrected Subscale-Total correlation</b> |
| <b>Control (4 items; scale range 0-12)</b>                                                            |                           |                        |                          |                          |                                         |                                             |
| Ethnibus                                                                                              | 7.767                     | 1.714                  | -0.109                   | -0.005                   | 0.136 – 0.382                           | 0.349                                       |
| ONS Omnibus                                                                                           | 7.881                     | 2.601                  | -0.334                   | 0.532                    | 0.433 – 0.662                           | 0.684                                       |
| <b>Autonomy (5 items; scale range 0-15 )</b>                                                          |                           |                        |                          |                          |                                         |                                             |
| Ethnibus                                                                                              | 9.437                     | 2.196                  | -0.342                   | 0.420                    | 0.135 – 0.382                           | 0.316                                       |
| ONS Omnibus                                                                                           | 11.000                    | 2.607                  | -0.461                   | 0.013                    | 0.407 – 0.662                           | 0.655                                       |
| <b>Pleasure: (5 items; scale range 0-15)</b>                                                          |                           |                        |                          |                          |                                         |                                             |
| Ethnibus                                                                                              | 19.870                    | 2.162                  | -0.096                   | 0.686                    | 0.135 – 0.258                           | 0.269                                       |
| ONS Omnibus                                                                                           | 13.502                    | 1.896                  | -1.411                   | 1.563                    | 0.407 – 0.537                           | 0.547                                       |
| <b>Self-realisation: (5 items; scale range 0-15)</b>                                                  |                           |                        |                          |                          |                                         |                                             |
| Ethnibus                                                                                              | 6.660                     | 2.220                  | 0.147                    | 0.228                    | 0.136 – 0.258                           | 0.269                                       |
| ONS Omnibus                                                                                           | 9.574                     | 2.842                  | -0.483                   | 0.024                    | 0.519 – 0.549                           | 0.647                                       |
