# Supplementary material for: The Psychometric Properties of the Older People's Quality of Life Questionnaire, Compared with the CASP-19 and the WHOQOL-OLD
Source: PubMed Central journal article supplement (PMC2819744; doi:10.1155/2009/298950), 2010-02-01
Supplement: 298950.f7.pdf [file 298950.f7.pdf]

| <b>Supplementary file Table 6. WHOQOL-old subscale reliability</b>      |                          |                        |                          |                          |                                         |                                             |
|-------------------------------------------------------------------------|--------------------------|------------------------|--------------------------|--------------------------|-----------------------------------------|---------------------------------------------|
| <b>WHOQOL Subscales:</b><br>[24 items; 5-point (1-5) scale range 24-120 | <b>Mean for subscale</b> | <b>sd for subscale</b> | <b>Subscale skewness</b> | <b>Subscale kurtosis</b> | <b>Inter Subscale Correlation range</b> | <b>Corrected Subscale-Total correlation</b> |
| <b>Sensory ability SAB</b><br>(4 items; scale range 4-20)               |                          |                        |                          |                          |                                         |                                             |
| Ethnibus                                                                | 15.067                   | 2.228                  | -0.459                   | 0.995                    | -0.011 – 0.141                          | 0.032                                       |
| ONS Omnibus                                                             | 16.869                   | 3.164                  | -1.273                   | 1.177                    | 0.043 – 0.395                           | 0.363                                       |
| <b>Autonomy AUT</b><br>(4 items; scale range )                          |                          |                        |                          |                          |                                         |                                             |
| Ethnibus                                                                | 14.245                   | 2.277                  | -0.289                   | 0.109                    | -0.200 – 0.097                          | 0.030                                       |
| ONS Omnibus                                                             | 14.906                   | 2.772                  | -0.530                   | 0.219                    | 0.095 – 0.554                           | 0.533                                       |
| <b>Present and future activities PPF</b><br>(4 items; scale range 4-20) |                          |                        |                          |                          |                                         |                                             |
| Ethnibus                                                                | 14.452                   | 2.440                  | -0.233                   | -0.232                   | -0.111 – 0.225                          | 0.229                                       |
| ONS Omnibus                                                             | 14.852                   | 2.712                  | -0.349                   | -0.220                   | 0.129 – 0.576                           | 0.626                                       |
| <b>Social participation SOP</b><br>(4 items; scale range 4-20)          |                          |                        |                          |                          |                                         |                                             |
| Ethnibus                                                                | 14.440                   | 2.220                  | 0.032                    | -0.400                   | -0.044 – 0.225                          | 0.156                                       |
| ONS Omnibus                                                             | 15.084                   | 2.842                  | -0.608                   | 0.412                    | 0.123 – 0.576                           | 0.551                                       |
| <b>Death and Dying DAD</b>                                              |                          |                        |                          |                          |                                         |                                             |

|                                                 |        |       |        |        |                   |        |
|-------------------------------------------------|--------|-------|--------|--------|-------------------|--------|
| <b>(4 items; scale range 4-20)</b>              |        |       |        |        |                   |        |
| Ethnibus                                        | 11.270 | 3.256 | 0.026  | -0.173 | -0.200 –<br>0.016 | -0.154 |
| ONS Omnibus                                     | 15.428 | 3.648 | -0.751 | -0.004 | 0.034 –<br>0.129  | 0.115  |
| <b>Intimacy INT (4 items; scale range 4-20)</b> |        |       |        |        |                   |        |
| Ethnibus                                        | 14.012 | 2.626 | -0.573 | 0.530  | -0.069 –<br>0.155 | 0.098  |
| ONS Omnibus                                     | 14.779 | 4.022 | -0.786 | -0.057 | 0.034 –<br>0.387  | 0.310  |
