# Supplementary material for: Contrato de trabajo e institutos conexos
Source: Hindawi journal article supplement (doi:10.1155/2009/298950), 1995-01-01
Supplement: f2 [file 298950.f2.pdf]

**Supplementary file Table 1. Older people's Quality of Life Questionnaire (OPQOL) items+**

|                                         | <b>Ethnibus<br/>2008</b>                 | <b>ONS<br/>Omnibus<br/>2008</b>          | <b>QoL Survey<br/>follow-up<br/>2007/8</b> |
|-----------------------------------------|------------------------------------------|------------------------------------------|--------------------------------------------|
|                                         | <b>(35 items,<br/>range 35-<br/>175)</b> | <b>(35 items,<br/>range 35-<br/>175)</b> | <b>(32 items,<br/>range 32-160)</b>        |
| <b>OPQOL items:</b>                     | <b>% (n)</b>                             | <b>% (n)</b>                             | <b>% (n)</b>                               |
| <b>1. Life overall:</b>                 |                                          |                                          |                                            |
| <i>1. + I enjoy my life overall</i>     |                                          |                                          |                                            |
| Strongly agree                          | 18 (73)                                  | 38 (224)                                 | 21 (59) ****                               |
| Agree                                   | 34 (137)                                 | 53 (310)                                 | 61 (171)                                   |
| Neither agree nor disagree              | 37 (148)                                 | 7 (42)                                   | 14 (40)                                    |
| Disagree                                | 9 (35)                                   | 2 (11)                                   | 4 (12)                                     |
| Strongly disagree                       | 2 (7)                                    | ---                                      |                                            |
| <i>2. + I am happy much of the time</i> |                                          |                                          |                                            |
| Strongly agree                          | 10 (41)                                  | 34 (197)                                 | 18 (50) ****                               |
| Agree                                   | 32 (126)                                 | 59 (344)                                 | 66 (184)                                   |
| Neither agree nor disagree              | 49 (196)                                 | 5 (32)                                   | 12 (32)                                    |
| Disagree                                | 8 (33)                                   | 2 (13)                                   | 4 (12)                                     |
| Strongly disagree                       | 1 (4)                                    | ---                                      | ---                                        |
| <i>3. + I look forward to things</i>    |                                          |                                          |                                            |
| Strongly agree                          | 15 (60)                                  | 36 (209)                                 | 21 (57) ****                               |
| Agree                                   | 42 (166)                                 | 53 (312)                                 | 58 (163)                                   |
| Neither agree nor disagree              | 38 (152)                                 | 8 (47)                                   | 17 (48)                                    |

|                                                             |          |          |             |
|-------------------------------------------------------------|----------|----------|-------------|
| Disagree                                                    | 5 (21)   | 3 (17)   | 4 (11)      |
| Strongly disagree                                           | --- (1)  | --- (2)  | ---         |
| <b>4. - Life gets me down</b>                               |          |          |             |
| Strongly agree                                              | 14 (57)  | 1 (8)    | 2 (4) ****  |
| Agree                                                       | 47 (187) | 12 (72)  | 7 (20)      |
| Neither agree nor disagree                                  | 23 (92)  | 17 (100) | 25 (69)     |
| Disagree                                                    | 12 (48)  | 48 (279) | 44 (118)    |
| Strongly disagree                                           | 4 (16)   | 22 (127) | 22 (61)     |
| <b>2. Health and functioning:</b>                           |          |          |             |
| <b>5. + I have a lot of physical energy</b>                 |          |          |             |
| Strongly agree                                              | 13 (53)  | 12 (71)  | 6 (17) **** |
| Agree                                                       | 41 (165) | 34 (202) | 28 (76)     |
| Neither agree nor disagree                                  | 30 (121) | 19 (113) | 36 (96)     |
| Disagree                                                    | 13 (51)  | 29 (164) | 27 (74)     |
| Strongly disagree                                           | 3 (10)   | 6 (36)   | 3 (9)       |
| <b>6. - Pain affects my well-being±</b>                     |          |          |             |
| Strongly agree                                              | 14 (56)  | 8 (50)   | 8 (21) **** |
| Agree                                                       | 40 (161) | 29 (169) | 28 (76)     |
| Neither agree nor disagree                                  | 32 (128) | 15 (86)  | 21 (56)     |
| Disagree                                                    | 10 (39)  | 35 (205) | 33 (89)     |
| Strongly disagree                                           | 4 (16)   | 13 (77)  | 10 (28)     |
| 7. - My health restricts me looking after myself or my home |          |          |             |

|                                                                           |          |          |               |
|---------------------------------------------------------------------------|----------|----------|---------------|
| Strongly agree                                                            | 15 (61)  | 4 (26)   | 5 (13) ****   |
| Agree                                                                     | 33 (133) | 15 (88)  | 12 (34)       |
| Neither agree nor disagree                                                | 37 (148) | 7 (39)   | 14 (39)       |
| Disagree                                                                  | 11 (44)  | 47 (276) | 43 (119)      |
| Strongly disagree                                                         | 4 (14)   | 27 (158) | 26 (71)       |
| <b>8. + I am healthy enough to get out and about</b>                      |          |          |               |
| Strongly agree                                                            | 8 (30)   | 39 (227) | 29 (81) ****  |
| Agree                                                                     | 32 (130) | 47 (276) | 51 (144)      |
| Neither agree nor disagree                                                | 48 (192) | 5 (31)   | 9 (24)        |
| Disagree                                                                  | 11 (44)  | 5 (30)   | 8 (21)        |
| Strongly disagree                                                         | 1 (4)    | 4 (23)   | 3 (10)        |
| <b>3a. Social relationships:</b>                                          |          |          |               |
| <b>9. + My family, friends or neighbours would help me if needed</b>      |          |          |               |
| Strongly agree                                                            | 6 (26)   | 49 (286) | 44 (125) **** |
| Agree                                                                     | 31 (123) | 45 (263) | 49 (138)      |
| Neither agree nor disagree                                                | 55 (219) | 4 (23)   | 6 (18)        |
| Disagree                                                                  | 8 (31)   | 2 (12)   | --- (1)       |
| Strongly disagree                                                         | --- (1)  | --- (2)  | --- (1)       |
| <b>10. - I would like more companionship or contact with other people</b> |          |          |               |
| Strongly agree                                                            | 3 (13)   | 4 (21)   | 4 (10) ****   |
| Agree                                                                     | 33 (134) | 16 (95)  | 19 (53)       |

|                                                                          |          |          |               |
|--------------------------------------------------------------------------|----------|----------|---------------|
| Neither agree nor disagree                                               | 42 (167) | 27 (157) | 42 (117)      |
| Disagree                                                                 | 20 (79)  | 46 (272) | 29 (79)       |
| Strongly disagree                                                        | 2 (7)    | 7 (41)   | 6 (17)        |
| <b><i>11. + I have someone who gives me love and affection</i></b>       |          |          |               |
| Strongly agree                                                           | 10 (38)  | 50 (297) | 45 (125) **** |
| Agree                                                                    | 45 (178) | 38 (222) | 35 (96)       |
| Neither agree nor disagree                                               | --- ---  | 5 (28)   | 13 (36)       |
| Disagree                                                                 | 44 (177) | 5 (29)   | 6 (17)        |
| Strongly disagree                                                        | 2 (7)    | 2 (10)   | 1 (4)         |
| <b><i>12/a - I'd like more people to enjoy life with</i></b>             |          |          |               |
| Strongly agree                                                           | 3 (14)   | 4 (25)   | 5 (13) ****   |
| Agree                                                                    | 32 (130) | 25 (149) | 21 (58)       |
| Neither agree nor disagree                                               | 41 (164) | 27 (157) | 42 (116)      |
| Disagree                                                                 | 22 (86)  | 39 (229) | 27 (76)       |
| Strongly disagree                                                        | 2 (6)    | 5 (27)   | 5 (14)        |
| <b><i>12/b. Aia.± + I have my children around which is important</i></b> |          |          |               |
| Strongly agree                                                           | 10 (38)  | 37 (217) | n/a           |
| Agree                                                                    | 34 (138) | 31 (182) |               |
| Neither agree nor disagree                                               | 39 (156) | 11 (63)  |               |
| Disagree                                                                 | 15 (61)  | 11 (64)  |               |
| Strongly disagree [includes no children]                                 | 2 (7)    | 9 (54)   |               |

|                                                                                                                  |          |          |              |
|------------------------------------------------------------------------------------------------------------------|----------|----------|--------------|
| <b>4. Independence, control over life, freedom:</b>                                                              |          |          |              |
| <b>13. + I am healthy enough to have my independence</b><br><i>(independence- health)</i>                        |          |          |              |
| Strongly agree                                                                                                   | 7 (26)   | 39 (231) | 32 (93) **** |
| Agree                                                                                                            | 23 (93)  | 48 (282) | 50 (142)     |
| Neither agree nor disagree                                                                                       | 41 (163) | 5 (25)   | 9 (26)       |
| Disagree                                                                                                         | 23 (93)  | 6 (37)   | 7 (19)       |
| Strongly disagree                                                                                                | 6 (25)   | 2 (12)   | 2 (6)        |
| <b>14. + I can please myself what I do</b> <i>(freedom, autonomy)</i>                                            |          |          |              |
| Strongly agree                                                                                                   | 10 (39)  | 42 (246) | 30 (84) **** |
| Agree                                                                                                            | 45 (180) | 48 (281) | 53 (151)     |
| Neither agree nor disagree                                                                                       | 15 (62)  | 6 (37)   | 11 (31)      |
| Disagree                                                                                                         | 24 (94)  | 3 (15)   | 5 (14)       |
| Strongly disagree                                                                                                | 6 (25)   | 1 (8)    | 1 (4)        |
| <b>15. - The cost of things compared to my pension/income restricts my life</b> <i>(independence- financial)</i> |          |          |              |
| Strongly agree                                                                                                   | 12 (48)  | 11 (64)  | 8 (23) ****  |
| Agree                                                                                                            | 15 (60)  | 28 (162) | 23 (65)      |
| Neither agree nor disagree                                                                                       | 24 (96)  | 20 (119) | 31 (86)      |
| Disagree                                                                                                         | 42 (169) | 36 (213) | 32 (91)      |
| Strongly disagree                                                                                                | 7 (27)   | 5 (29)   | 6 (18)       |

|                                                                                              |          |          |              |
|----------------------------------------------------------------------------------------------|----------|----------|--------------|
| <b>16. + I have a lot of control over the important things in my life (control)</b>          |          |          |              |
| Strongly agree                                                                               | 13 (53)  | 37 (219) | 26 (74) **** |
| Agree                                                                                        | 41 (163) | 53 (313) | 56 (161)     |
| Neither agree nor disagree                                                                   | 29 (115) | 6 (32)   | 14 (40)      |
| Disagree                                                                                     | 17 (69)  | 4 (22)   | 3 (8)        |
| Strongly disagree                                                                            | --- ---  | --- (1)  | 1 (3)        |
| <b>32. - I have responsibilities to others that restrict my social or leisure activities</b> |          |          |              |
| Strongly agree                                                                               | 5 (18)   | 3 (15)   | 4 (12) ****  |
| Agree                                                                                        | 15 (59)  | 10 (60)  | 12 (33)      |
| Neither agree nor disagree                                                                   | 20 (82)  | 7 (40)   | 16 (44)      |
| Disagree                                                                                     | 38 (152) | 62 (365) | 50 (135)     |
| Strongly disagree                                                                            | 22 (89)  | 18 (107) | 17 (47)      |
| <b>5. Home and neighbourhood:</b>                                                            |          |          |              |
| <b>17. + I feel safe where I live</b>                                                        |          |          |              |
| Strongly agree                                                                               | 14 (190) | 46 (269) | 35 (99) **** |
| Agree                                                                                        | 40 (161) | 47 (275) | 53 (151)     |
| Neither agree nor disagree                                                                   | 9 (36)   | 4 (24)   | 9 (26)       |
| Disagree                                                                                     | 3 (12)   | 2 (13)   | 3 (7)        |
| Strongly disagree                                                                            | --- (1)  | 1 (6)    | --- (1)      |
| <b>18. + The local shops, services and facilities are good overall</b>                       |          |          |              |

|                                                                         |          |          |               |
|-------------------------------------------------------------------------|----------|----------|---------------|
| Strongly agree                                                          | 32 (127) | 22 (132) | 23 (64) ****  |
| Agree                                                                   | 54 (216) | 50 (293) | 59 (168)      |
| Neither agree nor disagree                                              | 13 (53)  | 11 (60)  | 9 (26)        |
| Disagree                                                                | 1 (4)    | 14 (83)  | 7 (20)        |
| Strongly disagree                                                       | --- ---  | 3 (18)   | 2 (5)         |
| <b><i>19. + I get pleasure from my home</i></b>                         |          |          |               |
| Strongly agree                                                          | 5 (18)   | 45 (263) | 44 (124) **** |
| Agree                                                                   | 33 (133) | 51 (299) | 50 (140)      |
| Neither agree nor disagree                                              | 49 (197) | 3 (17)   | 5 (15)        |
| Disagree                                                                | 12 (48)  | 1 (8)    | 1 (4)         |
| Strongly disagree                                                       | 1 (4)    | ---      |               |
| <b><i>20. + I find my neighbourhood friendly</i></b>                    |          |          |               |
| Strongly agree                                                          | 4 (15)   | 36 (209) | 28 (80) ****  |
| Agree                                                                   | 21 (86)  | 53 (314) | 54 (152)      |
| Neither agree nor disagree                                              | 58 (232) | 7 (44)   | 15 (41)       |
| Disagree                                                                | 16 (62)  | 3 (16)   | 3 (8)         |
| Strongly disagree                                                       | 1 (5)    | 1 (3)    | -- (1)        |
| <b>6. Psychological and emotional well-being:</b>                       |          |          |               |
| <b><i>21. + I take life as it comes and make the best of things</i></b> |          |          |               |
| Strongly agree                                                          | 14 (57)  | 43 (256) | 35 (98) ****  |
| Agree                                                                   | 45 (179) | 51 (302) | 58 (164)      |
| Neither agree nor disagree                                              | 35 (141) | 4 (22)   | 7 (19)        |

|                                                                                                                     |          |          |              |
|---------------------------------------------------------------------------------------------------------------------|----------|----------|--------------|
| Disagree                                                                                                            | 6 (23)   | 1 (6)    | ---          |
| Strongly disagree                                                                                                   | ---      | ---      | (1) ---      |
| <b>22. + I feel lucky compared to most people</b>                                                                   |          |          |              |
| Strongly agree                                                                                                      | 6 (22)   | 42 (243) | 33 (92) **** |
| Agree                                                                                                               | 23 (90)  | 49 (289) | 54 (151)     |
| Neither agree nor disagree                                                                                          | 42 (169) | 7 (43)   | 12 (35)      |
| Disagree                                                                                                            | 24 (98)  | 2 (11)   | 1 (3)        |
| Strongly disagree                                                                                                   | 5 (21)   | ---      | (2) ---      |
| <b>23. + I tend to look on the bright side</b>                                                                      |          |          |              |
| Strongly agree                                                                                                      | 10 (38)  | 35 (208) | 27 (76) **** |
| Agree                                                                                                               | 33 (133) | 55 (321) | 56 (158)     |
| Neither agree nor disagree                                                                                          | 37 (147) | 9 (50)   | 14 (40)      |
| Disagree                                                                                                            | 20 (82)  | 1 (8)    | 2 (6)        |
| Strongly disagree                                                                                                   | ---      | ---      | ---          |
| <b>24. + If my health limits social/leisure activities, then I will compensate and find something else I can do</b> |          |          |              |
| Strongly agree                                                                                                      | 24 (96)  | 19 (114) | 21 (59) **** |
| Agree                                                                                                               | 28 (112) | 62 (365) | 55 (154)     |
| Neither agree nor disagree                                                                                          | 30 (121) | 14 (83)  | 22 (62)      |
| Disagree                                                                                                            | 17 (67)  | 4 (20)   | 2 (6)        |
| Strongly disagree                                                                                                   | 1 (4)    | 1 (4)    | ---          |
| <b>7. Financial circumstances:</b>                                                                                  |          |          |              |



|                                                                                             |          |          |              |
|---------------------------------------------------------------------------------------------|----------|----------|--------------|
| <b>25. + I have enough money to pay for household bills</b>                                 |          |          |              |
| Strongly agree                                                                              | 17 (67)  | 25 (148) | 29 (81) **** |
| Agree                                                                                       | 17 (69)  | 66 (388) | 59 (168)     |
| Neither agree nor disagree                                                                  | 37 (149) | 5 (28)   | 9 (24)       |
| Disagree                                                                                    | 25 (99)  | 3 (18)   | 3 (10)       |
| Strongly disagree                                                                           | 4 (16)   | 1 (5)    |              |
| <b>26. + I have enough money to pay for household repairs or help needed in the house ø</b> |          |          |              |
| Strongly agree                                                                              | 12 (48)  | 19 (107) | 21 (57) **** |
| Agree                                                                                       | 11 (44)  | 51 (296) | 45 (125)     |
| Neither agree nor disagree                                                                  | 40 (161) | 19 (111) | 20 (57)      |
| Disagree                                                                                    | 31 (124) | 9 (53)   | 13 (37)      |
| Strongly disagree                                                                           | 6 (23)   | 2 (10)   | 1 (4)        |
| <b>27. + I can afford to buy what I want to</b>                                             |          |          |              |
| Strongly agree                                                                              | 9 (37)   | 10 (58)  | 17 (41) **** |
| Agree                                                                                       | 9 (37)   | 47 (275) | 41 (114)     |
| Neither agree nor disagree                                                                  | 38 (153) | 19 (110) | 23 (64)      |
| Disagree                                                                                    | 32 (128) | 21 (122) | 17 (49)      |
| Strongly disagree                                                                           | 12 (45)  | 3 (20)   | 2 (6)        |
| <b>28. - I cannot afford to do things I would enjoy</b>                                     |          |          |              |
| Strongly agree                                                                              | 8 (31)   | 5 (30)   | 3 (8) ****   |

|                                                                                 |          |          |              |
|---------------------------------------------------------------------------------|----------|----------|--------------|
| Agree                                                                           | 9 (36)   | 20 (116) | 19 (54)      |
| Neither agree nor disagree                                                      | 28 (112) | 20 (117) | 28 (77)      |
| Disagree                                                                        | 34 (134) | 48 (283) | 38 (106)     |
| Strongly disagree                                                               | 22 (87)  | 7 (39)   | 12 (35)      |
| <b>3b. Leisure and social activities:</b>                                       |          |          |              |
| <i>29. + I have social or leisure activities/hobbies that I enjoy doing</i>     |          |          |              |
| Strongly agree                                                                  | 8 (30)   | 28 (165) | 20 (57) **** |
| Agree                                                                           | 36 (144) | 51 (300) | 54 (149)     |
| Neither agree nor disagree                                                      | 30 (122) | 10 (57)  | 18 (49)      |
| Disagree                                                                        | 17 (68)  | 9 (51)   | 7 (20)       |
| Strongly disagree                                                               | 9 (36)   | 2 (13)   | 1 (4)        |
| <i>30. - I try to stay involved with things</i>                                 |          |          |              |
| Strongly agree                                                                  | 8 (32)   | 26 (154) | 18 (51) **** |
| Agree                                                                           | 30 (120) | 57 (335) | 57 (157)     |
| Neither agree nor disagree                                                      | 40 (159) | 9 (55)   | 21 (57)      |
| Disagree                                                                        | 17 (68)  | 7 (39)   | 3 (9)        |
| Strongly disagree                                                               | 5 (21)   | 1 (3)    | 1 (4)        |
| <i>31. + I do paid or unpaid work or activities that give me a role in life</i> |          |          |              |
| Strongly agree                                                                  | 8 (30)   | 13 (79)  | 9 (23) ****  |
| Agree                                                                           | 18 (71)  | 22 (128) | 18 (47)      |
| Neither agree nor disagree                                                      | 32 (128) | 9 (52)   | 16 (42)      |

|                                                                              |                                             |                                                                                           |                                                                       |
|------------------------------------------------------------------------------|---------------------------------------------|-------------------------------------------------------------------------------------------|-----------------------------------------------------------------------|
| Disagree                                                                     | 30 (121)                                    | 41 (239)                                                                                  | 42 (113)                                                              |
| Strongly disagree                                                            | 12 (50)                                     | 15 (85)                                                                                   | 16 (44)                                                               |
| <b>8. Religion/culture:</b>                                                  |                                             |                                                                                           |                                                                       |
| <i>Aic. ± + Religion, belief or philosophy is important to my QoL</i>        |                                             |                                                                                           |                                                                       |
| Strongly agree                                                               | 11 (45)                                     | 18<br>(106)**                                                                             | n/a                                                                   |
| Agree                                                                        | 47 (187)                                    | 37 (216)                                                                                  |                                                                       |
| Neither agree nor disagree                                                   | 23 (92)                                     | 21 (125)                                                                                  |                                                                       |
| Disagree                                                                     | 16 (65)                                     | 18 (105)                                                                                  |                                                                       |
| Strongly disagree                                                            | 3 (11)                                      | 6 (35)                                                                                    |                                                                       |
| <i>Aid. ± + Cultural /religious events/festivals are important to my QoL</i> |                                             |                                                                                           |                                                                       |
| Strongly agree                                                               | 13 (51)                                     | 12 (72)ns                                                                                 | n/a                                                                   |
| Agree                                                                        | 51 (205)                                    | 29 (169)                                                                                  |                                                                       |
| Neither agree nor disagree                                                   | 23 (93)                                     | 23 (135)                                                                                  |                                                                       |
| Disagree                                                                     | 11 (42)                                     | 30 (174)                                                                                  |                                                                       |
| Strongly disagree                                                            | 2 (9)                                       | 6 (37)                                                                                    |                                                                       |
| <b>No. of respondents [item non-response]</b>                                | <b>400</b><br><i>[item non-response 0%]</i> | <b>585-587</b><br><i>[Ø 577 for financial item # 26; other item non-response: &lt;1%]</i> | <b>269-286</b><br><i>[item non-response 5-10% (+1 item only=11%)]</i> |

+ Please indicate the extent to which you agree or disagree with each of the

*following statements*

OPQOL: reverse coding of positively worded items (5-1) so higher scores represented higher QoL

ns not statistically significant at least at  $p < 0.05$  level

**\*\*  $p < 0.01$**

**\*\*\*\*  $p < 0.0001$**

*± Additional items inserted in Ethnibus and ONS Omnibus Surveys recommended by Ethnibus focus group members and refined with Ethnibus staff (QoL follow-up questionnaires had already been mailed out and did not include these additional items)*

*± Ethnibus feedback from interviewers: item 6 QOL is based on physical, psychological and emotional pain due to family and domestic issues. This is a cultural interpretation of the word "pain".*
