# Supplementary material for: Contrato de trabajo e institutos conexos
Source: Hindawi journal article supplement (doi:10.1155/2009/298950), 1995-01-01
Supplement: f5 [file 298950.f5.pdf]

**Supplementary file Table 4. OPQOL subscale reliability**

| <b>OPQOL Subscale:</b><br>[Ethnibus, ONS Omnibus 35 items; 5-point scale (1-5) range 35-175; QoL follow-up: 32 items, range 32-160 ] | <b>Mean for subscale score</b> | <b>sd for subscale score</b> | <b>Subscale score skewness</b> | <b>Subscale score kurtosis</b> | <b>Inter Subscale Correlation range</b> | <b>Corrected Subscale-Total correlation</b> |
|--------------------------------------------------------------------------------------------------------------------------------------|--------------------------------|------------------------------|--------------------------------|--------------------------------|-----------------------------------------|---------------------------------------------|
| <b>Life overall (4 items; scale range 4-20)</b>                                                                                      |                                |                              |                                |                                |                                         |                                             |
| Ethnibus                                                                                                                             | 13.108                         | 2.074                        | 0.474                          | 0.552                          | -0.011 – 0.303                          | 0.314                                       |
| ONS Omnibus                                                                                                                          | 16.478                         | 2.399                        | -0.595                         | 0.591                          | 0.086 – 0.559                           | 0.692                                       |
| QoL follow up                                                                                                                        | 15.685                         | 2.557                        | -0.536                         | 0.731                          | 0.268 – 0.798                           | 0.761                                       |
| <b>Health and functioning (4 items; scale range 4-20)</b>                                                                            |                                |                              |                                |                                |                                         |                                             |
| Ethnibus                                                                                                                             | 11.883                         | 2.047                        | 0.152                          | 0.729                          | 0.057 – 0.147                           | 0.188                                       |
| ONS Omnibus                                                                                                                          | 14.218                         | 3.450                        | -0.513                         | -0.201                         | -0.024 – 0.521                          | 0.553                                       |
| QoL follow up                                                                                                                        | 14.000                         | 3.235                        | -0.386                         | -0.084                         | 0.219 – 0.713                           | 0.648                                       |
| <b>Social relationships and participation (8 items; scale range 8-40; NB 7 items for QoL follow-up sample; range 7-35)</b>           |                                |                              |                                |                                |                                         |                                             |
| Ethnibus                                                                                                                             | 25.123                         | 3.438                        | 0.208                          | 0.315                          | 0.047 – 0.560                           | 0.461                                       |
| ONS Omnibus                                                                                                                          | 29.723                         | 4.285                        | -0.454                         | 0.571                          | 0.214 – 0.559                           | 0.617                                       |
| QoL follow up                                                                                                                        | 25.215                         | 3.882                        | -0.081                         | 0.326                          | 0.363 – 0.791                           | 0.729                                       |
| <b>Control, independence, freedom (5 items; range 5-25)</b>                                                                          |                                |                              |                                |                                |                                         |                                             |
| Ethnibus                                                                                                                             | 12.958                         | 2.540                        | -0.250                         | -0.548                         | -0.011 – 0.438                          | 0.322                                       |
| ONS Omnibus                                                                                                                          | 19.467                         | 2.675                        | -0.419                         | 0.731                          | -0.006 – 0.521                          | 0.625                                       |
| QoL follow up                                                                                                                        | 18.624                         | 2.896                        | -0.331                         | 0.317                          | 0.181 – 0.714                           | 0.657                                       |
| <b>Area: Home and</b>                                                                                                                |                                |                              |                                |                                |                                         |                                             |

|                                                                       |        |       |        |        |                |       |
|-----------------------------------------------------------------------|--------|-------|--------|--------|----------------|-------|
| <b>neighbourhood<br/>(4 items; range 4-20)</b>                        |        |       |        |        |                |       |
| Ethnibus                                                              | 14.875 | 1.918 | 0.286  | -0.359 | 0.106 – 0.424  | 0.427 |
| ONS Omnibus                                                           | 16.894 | 2.155 | -0.456 | 0.491  | 0.070 – 0.458  | 0.493 |
| QoL follow up                                                         | 16.632 | 2.204 | -0.579 | 1.171  | 0.181 – 0.524  | 0.463 |
| <b>Psychological well-being and outlook<br/>(4 items; range 4-20)</b> |        |       |        |        |                |       |
| Ethnibus                                                              | 13.550 | 2.547 | -0.137 | -0.125 | 0.110 – 0.560  | 0.586 |
| ONS Omnibus                                                           | 16.889 | 1.968 | -0.192 | -0.291 | 0.180 – 0.553  | 0.540 |
| QoL follow up                                                         | 16.442 | 2.024 | 0.045  | -0.522 | 0.255 – 0.663  | 0.463 |
| <b>Financial circumstances<br/>(4 items; range 4-20)</b>              |        |       |        |        |                |       |
| Ethnibus                                                              | 12.363 | 2.801 | -0.110 | -0.332 | 0.047 – 0.438  | 0.249 |
| ONS Omnibus                                                           | 14.597 | 2.822 | -0.729 | 1.170  | 0.012 – 0.496  | 0.390 |
| QoL follow up                                                         | 14.786 | 3.096 | -0.251 | -0.308 | 0.275 – 0.668  | 0.600 |
| <b>Religion/culture<br/>(2 items; range 2-10)</b>                     |        |       |        |        |                |       |
| Ethnibus                                                              | 7.093  | 1.674 | -0.527 | 0.055  | 0.035 – 0.256  | 0.271 |
| ONS Omnibus                                                           | 6.542  | 2.118 | -0.179 | -0.651 | -0.006 – 0.214 | 0.101 |
| QoL follow up                                                         | n/a    | n/a   | n/a    | n/a    | n/a            | n/a   |
