# Supplementary material for: Contrato de trabajo e institutos conexos
Source: Hindawi journal article supplement (doi:10.1155/2009/298950), 1995-01-01
Supplement: f8 [file 298950.f8.pdf]

**Supplementary file Table 7. OPQOL and CASP-19 subscale and total correlations (Spearman's rho)**

|                                                           | <b>CASP-19<br/>[19 items]</b> |                 |                 |                             |                        |
|-----------------------------------------------------------|-------------------------------|-----------------|-----------------|-----------------------------|------------------------|
|                                                           | <b>CONTROL</b>                | <b>AUTONOMY</b> | <b>PLEASURE</b> | <b>SELF<br/>REALISATION</b> | <b>TOTAL<br/>SCORE</b> |
| <b>OPQOL total<br/>and sub-<br/>scales[35 items]</b>      |                               |                 |                 |                             |                        |
| <b>OPQOL Total</b>                                        |                               |                 |                 |                             |                        |
| Ethnibus                                                  | 0.193**                       | 0.294**         | 0.418**         | 0.344**                     | 0.488**                |
| ONS Omnibus                                               | 0.573**                       | 0.600**         | 0.551**         | 0.653**                     | 0.739**                |
| <b>Life overall</b>                                       |                               |                 |                 |                             |                        |
| Ethnibus                                                  | -0.047                        | -0.070          | 0.088           | 0.147**                     | 0.031                  |
| ONS Omnibus                                               | 0.500**                       | 0.477**         | 0.512**         | 0.543**                     | 0.621**                |
| <b>Health and<br/>functioning</b>                         |                               |                 |                 |                             |                        |
| Ethnibus                                                  | 0.080                         | 0.135**         | 0.087           | 0.056                       | 0.128**                |
| ONS Omnibus                                               | 0.534**                       | 0.549**         | 0.316**         | 0.611**                     | 0.655**                |
| <b>Social<br/>relationships<br/>and<br/>participation</b> |                               |                 |                 |                             |                        |
| Ethnibus                                                  | -0.043                        | -0.003          | 0.300**         | 0.285**                     | 0.194**                |
| ONS Omnibus                                               | 0.484**                       | 0.366**         | 0.453**         | 0.522**                     | 0.569**                |
| <b>Control,<br/>independence,<br/>freedom</b>             |                               |                 |                 |                             |                        |
| Ethnibus                                                  | 0.308**                       | 0.406**         | 0.378**         | 0.265**                     | 0.537**                |
| ONS Omnibus                                               | 0.430**                       | 0.604**         | 0.337**         | 0.393**                     | 0.549**                |

|                                             |         |         |         |         |         |
|---------------------------------------------|---------|---------|---------|---------|---------|
| <b>Area: Home and neighbourhood</b>         |         |         |         |         |         |
| Ethnibus                                    | 0.125*  | 0.030   | 0.334** | 0.197** | 0.269** |
| ONS Omnibus                                 | 0.275** | 0.217** | 0.373** | 0.347** | 0.372** |
| <b>Psychological well-being and outlook</b> |         |         |         |         |         |
| Ethnibus                                    | 0.040   | 0.142** | 0.273** | 0.311** | 0.279** |
| ONS Omnibus                                 | 0.345** | 0.274** | 0.416** | 0.354** | 0.415** |
| <b>Financial circumstances</b>              |         |         |         |         |         |
| Ethnibus                                    | 0.289** | 0.412** | 0.225** | 0.078   | 0.388** |
| ONS Omnibus                                 | 0.300** | 0.500** | 0.248** | 0.267** | 0.411** |
| <b>Religion/culture</b>                     |         |         |         |         |         |
| Ethnibus                                    | 0.045   | 0.057   | 0.214** | 0.173** | 0.193** |
| ONS Omnibus                                 | 0.001   | -0.038  | 0.149** | 0.141** | 0.064   |

\*  $p < 0.05$  \*\*  $p < 0.01$
