# Supplementary material for: Contrato de trabajo e institutos conexos
Source: Hindawi journal article supplement (doi:10.1155/2009/298950), 1995-01-01
Supplement: f9 [file 298950.f9.pdf]

**Supplementary file Table 8. OPQOL and WHOQOL-OLD subscale and total correlations (Spearman's rho)**

|                                                 | <b>WHOQOL-OLD [24 items]:</b> |                     |                                                |                                 |                            |                     |                    |
|-------------------------------------------------|-------------------------------|---------------------|------------------------------------------------|---------------------------------|----------------------------|---------------------|--------------------|
| <b>OPQOL [35 items]:</b>                        | <b>Sensory abilities SAB</b>  | <b>Autonomy AUT</b> | <b>Past, present and future Activities PPF</b> | <b>Social participation SOP</b> | <b>Death and dying DAD</b> | <b>Intimacy INT</b> | <b>TOTAL SCORE</b> |
| <b>OPQOL Total</b>                              |                               |                     |                                                |                                 |                            |                     |                    |
| Ethnibus                                        | 0.313**                       | 0.009               | 0.148**                                        | 0.134**                         | 0.334**                    | 0.028               | 0.405**            |
| ONS Omnibus                                     | 0.336**                       | 0.532**             | 0.584**                                        | 0.601**                         | 0.144**                    | 0.428**             | 0.699**            |
| <b>Life overall</b>                             |                               |                     |                                                |                                 |                            |                     |                    |
| Ethnibus                                        | 0.174**                       | 0.009               | 0.125**                                        | 0.119*                          | 0.025                      | -0.040              | 0.148**            |
| ONS Omnibus                                     | 0.263**                       | 0.435**             | 0.483**                                        | 0.468**                         | 0.156**                    | 0.349**             | 0.559**            |
| <b>Health and functioning</b>                   |                               |                     |                                                |                                 |                            |                     |                    |
| Ethnibus                                        | 0.108*                        | -0.017              | -0.096                                         | -0.005                          | 0.121*                     | -0.028              | 0.054              |
| ONS Omnibus                                     | 0.440**                       | 0.441**             | 0.403**                                        | 0.541**                         | 0.028                      | 0.210**             | 0.527**            |
| <b>Social relationships and participation</b>   |                               |                     |                                                |                                 |                            |                     |                    |
| Ethnibus                                        | 0.105*                        | -.118               | 0.048                                          | 0.080                           | 0.358**                    | -0.001              | 0.222**            |
| ONS Omnibus                                     | 0.279**                       | 0.414**             | 0.472**                                        | 0.530**                         | 0.045                      | 0.503**             | 0.624**            |
| <b>Control over life, independence, freedom</b> |                               |                     |                                                |                                 |                            |                     |                    |
| Ethnibus                                        | 0.275**                       | 0.070               | 0.123*                                         | 0.056                           | 0.152**                    | -0.056              | 0.235**            |

|                                             |         |         |         |         |         |         |         |
|---------------------------------------------|---------|---------|---------|---------|---------|---------|---------|
| ONS Omnibus                                 | 0.268** | 0.472** | 0.372** | 0.386** | 0.152** | 0.142** | 0.456** |
| <b>Area: Home and neighbourhood</b>         |         |         |         |         |         |         |         |
| Ethnibus                                    | 0.186** | 0.043   | 0.187** | 0.075   | 0.252** | 0.042   | 0.298** |
| ONS Omnibus                                 | 0.196** | 0.272** | 0.365** | 0.292** | 0.152** | 0.318** | 0.421** |
| <b>Psychological well-being and outlook</b> |         |         |         |         |         |         |         |
| Ethnibus                                    | 0.143** | -0.025  | 0.099*  | 0.110*  | 0.407** | 0.038   | 0.326** |
| ONS Omnibus                                 | 0.186** | 0.339** | 0.412** | 0.377** | 0.149** | 0.309** | 0.462** |
| <b>Financial circumstances</b>              |         |         |         |         |         |         |         |
| Ethnibus                                    | 0.250** | 0.134** | 0.184** | 0.151** | -0.050  | -0.101  | 0.207** |
| ONS Omnibus                                 | 0.086*  | 0.265** | 0.288** | 0.232** | 0.124** | 0.122** | 0.316** |
| <b>Religion/culture</b>                     |         |         |         |         |         |         |         |
| Ethnibus                                    | 0.220** | -0.004  | 0.038   | -0.004  | 0.214** | 0.192** | 0.264** |
| ONS Omnibus                                 | -0.012  | 0.072   | 0.162** | 0.125** | 0.021   | 0.163** | 0.148** |

\*  $p < 0.05$  \*\*  $p < 0.01$
