# Supplementary material for: Contrato de trabajo e institutos conexos
Source: Hindawi journal article supplement (doi:10.1155/2009/298950), 1995-01-01
Supplement: f10 [file 298950.f10.pdf]

**Supplementary file Table 9. CASP-19 and WHOQOL-OLD subscale and total correlations (Spearman's rho)**

|                         | <b>WHOQOL-OLD:</b>           |                     |                                                |                                 |                            |                     |                    |
|-------------------------|------------------------------|---------------------|------------------------------------------------|---------------------------------|----------------------------|---------------------|--------------------|
| <b>CASP-19</b>          | <b>Sensory abilities SAB</b> | <b>Autonomy AUT</b> | <b>Past, present and future activities PPF</b> | <b>Social participation SOP</b> | <b>Death and Dying DAD</b> | <b>Intimacy INT</b> | <b>TOTAL SCORE</b> |
| <b>CONTROL</b>          |                              |                     |                                                |                                 |                            |                     |                    |
| Ethnibus                | 0.128*                       | 0.172**             | 0.232**                                        | 0.144**                         | -0.038                     | 0.209**             | 0.301**            |
| ONS Omnibus             | 0.384**                      | 0.522**             | 0.482**                                        | 0.507**                         | 0.171**                    | 0.248**             | 0.599**            |
| <b>AUTONOMY</b>         |                              |                     |                                                |                                 |                            |                     |                    |
| Ethnibus                | 0.199**                      | 0.137**             | 0.136**                                        | 0.184**                         | -0.067                     | 0.129**             | 0.239**            |
| ONS Omnibus             | 0.347**                      | 0.526**             | 0.432**                                        | 0.438**                         | 0.197**                    | 0.127**             | 0.526**            |
| <b>PLEASURE</b>         |                              |                     |                                                |                                 |                            |                     |                    |
| Ethnibus                | 0.197**                      | -0.011              | 0.143**                                        | 0.020                           | 0.194**                    | 0.020               | 0.225**            |
| ONS Omnibus             | 0.213**                      | 0.367**             | 0.459**                                        | 0.368**                         | 0.099*                     | 0.414**             | 0.543**            |
| <b>SELF-REALISATION</b> |                              |                     |                                                |                                 |                            |                     |                    |
| Ethnibus                | 0.078                        | -0.044              | 0.017                                          | 0.029                           | 0.318**                    | 0.158**             | 0.253**            |
| ONS Omnibus             | 0.314**                      | 0.473**             | 0.547**                                        | 0.528**                         | 0.056                      | 0.348**             | 0.607**            |
| <b>TOTAL SCORE</b>      |                              |                     |                                                |                                 |                            |                     |                    |
| Ethnibus                | 0.243**                      | 0.087               | 0.193**                                        | 0.126*                          | 0.146**                    | 0.199**             | 0.380**            |
| ONS Omnibus             | 0.403**                      | 0.590**             | 0.588**                                        | 0.581**                         | 0.152**                    | 0.340**             | 0.694**            |

*n* Ethnibus: 400; ONS: 573;

\*  $p < 0.05$  \*\*  $p < 0.01$
