# Supplementary material for: The Psychometric Properties of the Older People's Quality of Life Questionnaire, Compared with the CASP-19 and the WHOQOL-OLD
Source: Curr Gerontol Geriatr Res. 2010 Feb 1;2009:298950. doi: 10.1155/2009/298950 (PMC2819744; doi:10.1155/2009/298950)
Supplement: Supplementary file 4 [file 298950.f4.pdf]

| <b>Supplementary file Table 3. WHOQOL-OLD items</b>                                                                                            |                      |                         |
|------------------------------------------------------------------------------------------------------------------------------------------------|----------------------|-------------------------|
|                                                                                                                                                | <b>Ethnibus 2008</b> | <b>ONS Omnibus 2008</b> |
| <b>WHOQOL-OLD items:</b>                                                                                                                       | <b>% (n)</b>         | <b>% (n)</b>            |
| <b>Sensory abilities:</b>                                                                                                                      |                      |                         |
| <i>1. + To what extent do impairments to your senses (e.g. hearing, vision, taste, smell, touch) affect your daily life?</i>                   |                      |                         |
| Not at all                                                                                                                                     | 12 (46)              | 51 (297)****            |
| A little                                                                                                                                       | 55 (218)             | 31 (183)                |
| A moderate amount                                                                                                                              | 24 (97)              | 11 (66)                 |
| Very much                                                                                                                                      | 8 (32)               | 6 (35)                  |
| An extreme amount                                                                                                                              | 1 (7)                | 1 (6)                   |
| <i>2. + To what extent does loss of, for example, hearing, vision, taste, smell or touch affect your ability to participate in activities?</i> |                      |                         |
| Not at all                                                                                                                                     | 12 (49)              | 61 (360)****            |
| A little                                                                                                                                       | 58 (231)             | 20 (119)                |
| A moderate amount                                                                                                                              | 26 (105)             | 10 (58)                 |
| Very much                                                                                                                                      | 3 (10)               | 8 (45)                  |

|                                                                                                                                                                |          |              |
|----------------------------------------------------------------------------------------------------------------------------------------------------------------|----------|--------------|
| An extreme amount                                                                                                                                              | ---      | 1 (5)        |
| <b>10. + To what extent do problems with your sensory functioning (e.g. hearing, vision, taste, smell, touch) affect your ability to interact with others?</b> |          |              |
| Not at all                                                                                                                                                     | 11 (46)  | 65 (383)**** |
| A little                                                                                                                                                       | 59 (234) | 22 (127)     |
| Moderately                                                                                                                                                     | 25 (99)  | 8 (47)       |
| Mostly                                                                                                                                                         | 5 (19)   | 4 (21)       |
| Completely                                                                                                                                                     | ---      | 1 (7)        |
| <b>20. - How would you rate your sensory functioning (e.g. hearing, vision, taste, smell, touch)?</b>                                                          |          |              |
| Very poor                                                                                                                                                      | 2 (7)    | 4 (21) ns    |
| Poor                                                                                                                                                           | 5 (19)   | 7 (44)       |
| Neither poor nor good                                                                                                                                          | 22 (90)  | 18 (103)     |
| Good                                                                                                                                                           | 46 (184) | 47 (274)     |
| Very good                                                                                                                                                      | 25 (100) | 24 (143)     |
| <b>Autonomy:</b>                                                                                                                                               |          |              |
| <b>3. - How much freedom do you have to make your own decisions?</b>                                                                                           |          |              |
| <i>Not</i> at all ( <i>sic</i> )                                                                                                                               | 15 (61)  | 2 (13)****   |
| A little                                                                                                                                                       | 12 (49)  | 5 (29)       |

|                                                                                                    |          |           |
|----------------------------------------------------------------------------------------------------|----------|-----------|
| A moderate amount                                                                                  | 19 (75)  | 13 (77)   |
| Very much                                                                                          | 28 (110) | 52 (302)  |
| An extreme amount                                                                                  | 26 (105) | 28 (166)  |
| <b><i>4. - To what extent do you feel in control of your future?</i></b>                           |          |           |
| Not at all                                                                                         | 1 (5)    | 6 (33)**  |
| A little                                                                                           | 8 (31)   | 10 (58)   |
| A moderate amount                                                                                  | 24 (97)  | 21 (124)  |
| Very much                                                                                          | 43 (172) | 51 (292)  |
| An extreme amount                                                                                  | 24 (95)  | 12 (70)   |
| <b><i>5. - How much do you feel that the people around you are respectful of your freedom?</i></b> |          |           |
| Not at all                                                                                         | 3 (13)   | 2 (14) ns |
| A little                                                                                           | 7 (28)   | 5 (29)    |
| A moderate amount                                                                                  | 32 (127) | 18 (103)  |
| Very much                                                                                          | 39 (155) | 59 (344)  |
| An extreme amount                                                                                  | 19 (77)  | 15 (87)   |
| <b><i>11. - To what extent are you able to do the things you'd like to do?</i></b>                 |          |           |
| Not at all                                                                                         | 3 (10)   | 6 (38)**  |
| A little                                                                                           | 14 (54)  | 14 (84)   |
| Moderately                                                                                         | 37 (150) | 19 (108)  |

|                                                                                                      |          |            |
|------------------------------------------------------------------------------------------------------|----------|------------|
| Mostly                                                                                               | 31 (125) | 42 (241)   |
| Completely                                                                                           | 15 (61)  | 19 (114)   |
| <b>Past, present and future abilities:</b>                                                           |          |            |
| <i>12. - To what extent are you satisfied with your opportunities to continue achieving in life?</i> |          |            |
| Not at all                                                                                           | 2 (8)    | 8 (46)**** |
| A little                                                                                             | 11 (43)  | 12 (68)    |
| Moderately                                                                                           | 31 (126) | 25 (145)   |
| Mostly                                                                                               | 37 (149) | 38 (221)   |
| Completely                                                                                           | 19 (74)  | 17 (98)    |
| <i>13. - How much do you feel that you have received the recognition you deserve in life?</i>        |          |            |
| Not at all                                                                                           | 4 (16)   | 4 (23) ns  |
| A little                                                                                             | 16 (64)  | 14 (75)    |
| Moderately                                                                                           | 35 (140) | 29 (164)   |
| Mostly                                                                                               | 32 (127) | 37 (213)   |
| Completely                                                                                           | 13 (53)  | 17 (99)    |
| <i>15. - How satisfied with what you have achieved in life?</i>                                      |          |            |
| Very dissatisfied                                                                                    | 14 (56)  | 6 (33)**   |
| Dissatisfied                                                                                         | 7 (27)   | 4 (21)     |

|                                    |          |          |
|------------------------------------|----------|----------|
| Neither satisfied nor dissatisfied | 17 (70)  | 11 (62)  |
| Satisfied                          | 30 (118) | 53 (313) |
| Very satisfied                     | 32 (129) | 26 (155) |

|                                                                                 |          |          |
|---------------------------------------------------------------------------------|----------|----------|
| <b>19. - How happy are you with the things you are able to look forward to?</b> |          |          |
| Very unhappy                                                                    | 2 (7)    | 4 (23)*  |
| Unhappy                                                                         | 6 (25)   | 3 (19)   |
| Neither happy nor unhappy                                                       | 22 (88)  | 16 (91)  |
| Happy                                                                           | 38 (152) | 50 (296) |
| Very happy                                                                      | 32 (128) | 27 (156) |
| <b>Social participation</b>                                                     |          |          |
| <b>14. - To what extent do you feel that you have enough to do each day?</b>    |          |          |
| Not at all                                                                      | 2 (7)    | 1 (7) ns |
| A little                                                                        | 11 (44)  | 8 (47)   |
| Moderately                                                                      | 39 (157) | 16 (93)  |
| Mostly                                                                          | 29 (115) | 43 (252) |
| Completely                                                                      | 19 (77)  | 32 (184) |
| <b>16. - How satisfied are you with the way you use your time?</b>              |          |          |
| Very dissatisfied                                                               | 7 (26)   | 3 (19)** |
| Dissatisfied                                                                    | 16 (63)  | 5 (32)   |

|                                                                                                 |          |            |
|-------------------------------------------------------------------------------------------------|----------|------------|
| Neither satisfied nor dissatisfied                                                              | 26 (104) | 15 (85)    |
| Satisfied                                                                                       | 28 (114) | 56 (328)   |
| Very satisfied                                                                                  | 23 (93)  | 21 (121)   |
| <b>17. - How satisfied are you with your level of activity?</b>                                 |          |            |
| Very dissatisfied                                                                               | 4 (15)   | 4 (23) ns  |
| Dissatisfied                                                                                    | 7 (29)   | 14 (83)    |
| Neither satisfied nor dissatisfied                                                              | 29 (118) | 13 (78)    |
| Satisfied                                                                                       | 38 (150) | 51 (298)   |
| Very satisfied                                                                                  | 22 (88)  | 18 (103)   |
| <b>18. - How satisfied are you with your opportunity to participate in community activities</b> |          |            |
| Very dissatisfied                                                                               | 2 (7)    | 4 (23) *   |
| Dissatisfied                                                                                    | 4 (14)   | 9 (50)     |
| Neither satisfied nor dissatisfied                                                              | 32 (130) | 30 (173)   |
| Satisfied                                                                                       | 39 (157) | 43 (254)   |
| Very satisfied                                                                                  | 23 (92)  | 14 (84)    |
| <b>Death and Dying:</b>                                                                         |          |            |
| <b>6. + How concerned are you about the way in which you will die?</b>                          |          |            |
| Not at all                                                                                      | 11 (43)  | 47 (268)** |
| A little                                                                                        | 21 (83)  | 27 (156)   |

|                                                                                      |          |               |
|--------------------------------------------------------------------------------------|----------|---------------|
| A moderate amount                                                                    | 33 (134) | 15 (87)       |
| Very much                                                                            | 22 (89)  | 9 (51)        |
| An extreme amount                                                                    | 13 (51)  | 2 (12)        |
| <b>7. + <i>How much are you afraid of not being able to control your death?</i>+</b> |          |               |
| Not at all                                                                           | 7 (26)   | 45 (256)***** |
| Slightly                                                                             | 23 (92)  | 22 (127)      |
| Moderately                                                                           | 27 (109) | 15 (86)       |
| Very                                                                                 | 25 (101) | 13 (78)       |
| Extremely                                                                            | 18 (72)  | 4 (23)        |
| <b>8. + <i>How scared are you of dying?</i>+</b>                                     |          |               |
| Not at all                                                                           | 15 (60)  | 59 (341)***** |
| Slightly                                                                             | 23 (91)  | 22 (124)      |
| Moderately                                                                           | 29 (117) | 11 (66)       |
| Very                                                                                 | 16 (65)  | 5 (30)        |
| Extremely                                                                            | 17 (67)  | 3 (15)        |
| <b>9. + <i>How much do you fear being in pain before you die?</i></b>                |          |               |
| Not at all                                                                           | 5 (21)   | 21 (120) ns   |
| A little                                                                             | 11 (45)  | 27 (158)      |
| A moderate amount                                                                    | 32 (126) | 18 (100)      |
| Very much                                                                            | 37 (148) | 26 (146)      |
| An extreme amount                                                                    | 15 (60)  | 8 (47)        |

|                                                                                |          |           |
|--------------------------------------------------------------------------------|----------|-----------|
| <b>Intimacy:</b>                                                               |          |           |
| <b>21. - To what extent do you feel a sense of companionship in your life?</b> |          |           |
| Not at all                                                                     | 4 (14)   | 5 (29) ns |
| A little                                                                       | 8 (31)   | 12 (68)   |
| A moderate amount                                                              | 26 (104) | 18 (103)  |
| Very much                                                                      | 44 (178) | 47 (277)  |
| An extreme amount                                                              | 18 (73)  | 18 (104)  |
| <b>22. - To what extent do you experience love in your life?</b>               |          |           |
| Not at all                                                                     | 2 (7)    | 5 (31)**  |
| A little                                                                       | 11 (43)  | 11 (62)   |
| A moderate amount                                                              | 29 (117) | 13 (78)   |
| Very much                                                                      | 37 (147) | 47 (274)  |
| An extreme amount                                                              | 21 (86)  | 24 (139)  |
| <b>23. - To what extent do you have opportunities to love?</b>                 |          |           |
| Not at all                                                                     | 5 (19)   | 8 (46)**  |
| A little                                                                       | 17 (69)  | 10 (57)   |
| Moderately                                                                     | 30 (119) | 19 (110)  |
| Mostly                                                                         | 36 (145) | 35 (204)  |
| Completely                                                                     | 12 (48)  | 28 (165)  |
| <b>24. - To what extent do you have</b>                                        |          |           |

|                                               |                                   |                                         |
|-----------------------------------------------|-----------------------------------|-----------------------------------------|
| <i>opportunities to be loved?</i>             |                                   |                                         |
| Not at all                                    | 3 (12)                            | 8 (45)***                               |
| A little                                      | 16 (64)                           | 9 (55)                                  |
| Moderately                                    | 31 (123)                          | 17 (102)                                |
| Mostly                                        | 42 (170)                          | 38 (221)                                |
| Completely                                    | 8 (31)                            | 26 (155)                                |
| <b>No. of respondents [item non-response]</b> | <b>400 [item non-response 0%]</b> | <b>570-587 [item non-response 1-3%]</b> |

+ this slight WHOQOL alteration in response categories for these two items was overlooked in error: Not at all, Slightly, Moderately, Very, Extremely

-+**Note** + **WHOQOL-OLD** reverse coding of positively worded items (5-1), with higher scores representing higher QoL

ns not statistically significant at least at  $p < 0.05$  level

\*  $p < 0.05$

\*\*  $p < 0.01$

\*\*\*  $p < 0.001$

\*\*\*\*  $P < 0.0001$
